# Supplementary material for: Targeting SphK2 Reverses Acquired Resistance of Regorafenib in Hepatocellular Carcinoma
Source: PubMed Central journal article supplement (PMC7327090; doi:10.3389/fonc.2020.00694), 2020-06-24
Supplement: Data_Sheet_1.pdf [file Data_Sheet_1.pdf]

# Targeting SphK2 reverses acquired resistance of regorafenib in hepatocellular carcinoma

Weiwei Shi<sup>1, 2, #</sup>, Shan Zhang<sup>1, 2, #</sup>, Ding Ma<sup>1, 2</sup>, Dongliang Yan<sup>3</sup>, Guang Zhang<sup>1, 2, 3</sup>, Yin Cao<sup>1, 2, 3</sup>, Zhongxia Wang<sup>1, 2, 3, \*</sup>, Junhua Wu<sup>2, \*</sup>, Chunping Jiang<sup>1, 2, 3, \*</sup>.

<sup>1</sup>Department of Hepatobiliary Surgery, the Affiliated Drum Tower Hospital of Nanjing University Medical School, Nanjing, Jiangsu 210008, China

<sup>2</sup>Jiangsu Key Laboratory of Molecular Medicine, Medical School, Nanjing University, Nanjing, Jiangsu 210093, China

<sup>3</sup>Department of Hepatobiliary Surgery, Drum Tower Clinical College of Nanjing Medical University, Nanjing, Jiangsu 210008, China

# These authors contributed equally to this work.

## \* Correspondence:

Chunping Jiang. [chunpingjiang@163.com](mailto:chunpingjiang@163.com).

Junhua Wu. [wujunhua@nju.edu.cn](mailto:wujunhua@nju.edu.cn).

Zhongxia Wang. [freud\\_t@126.com](mailto:freud_t@126.com).

## Supplementary Figure 1

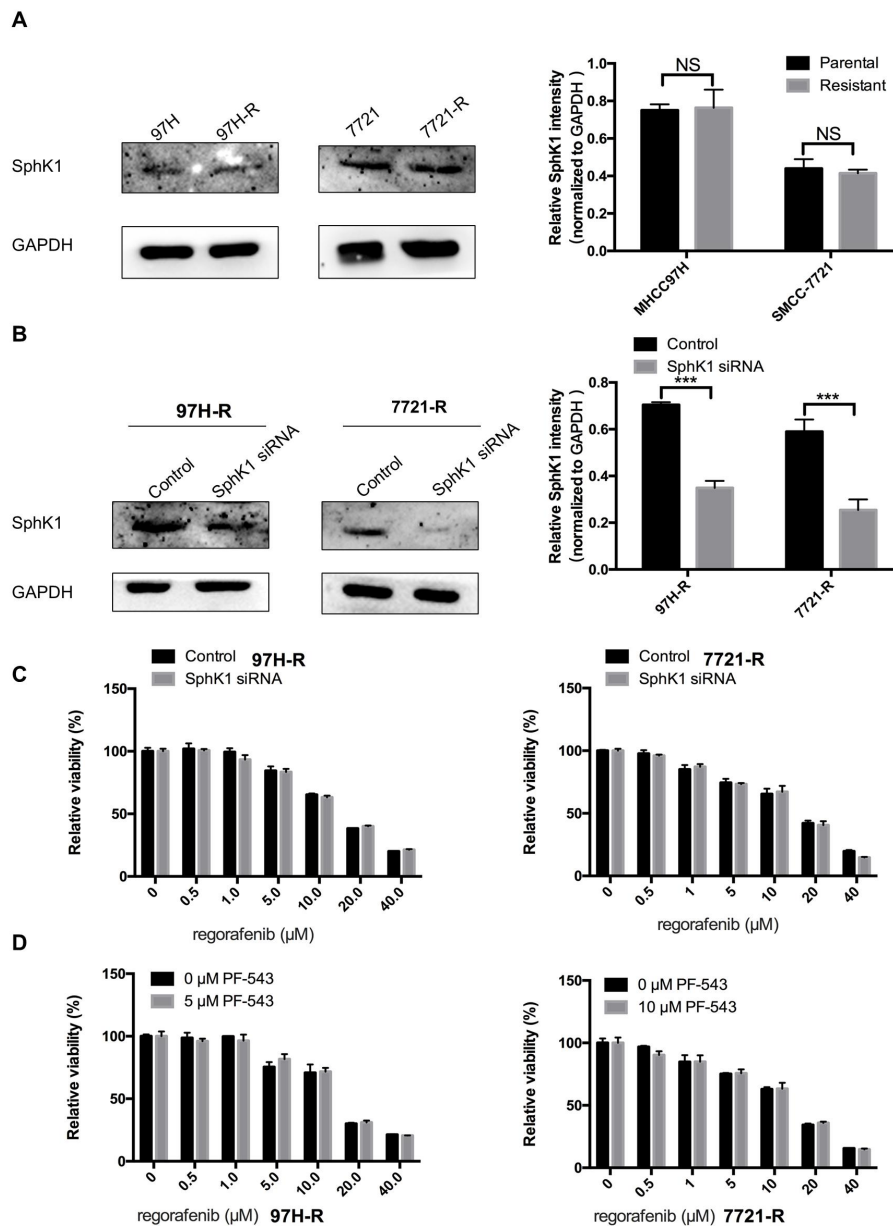

**Supplementary Figure 1. The role of SphK1 in regorafenib-resistant HCC cells.** (A) SphK1 protein expression levels in parental and regorafenib-resistant HCC cells were determined by western blot analysis. (B) The protein expression levels of SphK1 in regorafenib-resistant HCC cells transfected with SphK1 siRNA or control siRNA were determined by western blot analysis. (C) Regorafenib-resistant HCC cells were transfected with SphK1 siRNA or control siRNA and treated with regorafenib. Cell viability was determined by the CCK-8 assay. (D) Cell viability of regorafenib-resistant HCC cells treated with regorafenib alone or together with PF-543 was determined by the CCK-8 assay. The results were obtained from three independent experiments. The error bars represent mean  $\pm$  SD from a representative experiment. \*\*\*  $p < 0.001$ , NS, not significant.

## Supplementary Figure 2

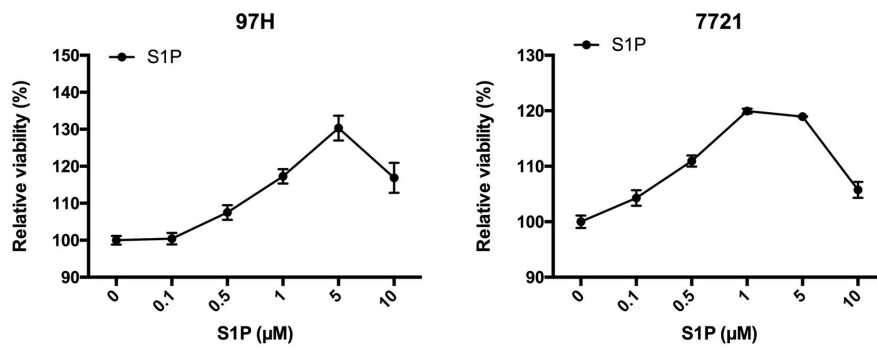

**Supplementary Figure 2. The effects of S1P on growth of HCC cells.** The effect of S1P on HCC cell viability was evaluated by the CCK-8 assay.

**Supplementary Table 1.** IC<sub>50</sub> values of regorafenib in regorafenib-resistant HCC cells transfected with control or SphK1 siRNA.

| Cell line | Group       | IC <sub>50</sub> (μM) |
|-----------|-------------|-----------------------|
| 97H-R     | Control     | 15.11                 |
|           | SphK1 siRNA | 15.08                 |
| 7721-R    | Control     | 14.31                 |
|           | SphK1 siRNA | 13.76                 |

**Supplementary Table 2.** IC<sub>50</sub> values of regorafenib in regorafenib-resistant HCC cells exposed to vehicle or SphK1 inhibitor PF-543.

| Cell line | Group        | IC <sub>50</sub> (μM) |
|-----------|--------------|-----------------------|
| 97H-R     | 0 μM PF-543  | 14.01                 |
|           | 5 μM PF-543  | 14.70                 |
| 7721-R    | 0 μM PF-543  | 12.61                 |
|           | 10 μM PF-543 | 12.50                 |

**Supplementary Table 3.** The suppliers and catalog numbers of all chemical compounds used in the study.

| REAGENTS                                                             | SUPPLIER                                  | CATALOG NUMBER   |
|----------------------------------------------------------------------|-------------------------------------------|------------------|
| <b>Antibodies</b>                                                    |                                           |                  |
| Rabbit monoclonal anti-Bcl2                                          | Cell Signaling Technology (MA, USA)       | Cat# 2870P       |
| Rabbit monoclonal anti-cleaved-PARP                                  | Cell Signaling Technology (MA, USA)       | Cat# 5625P       |
| Rabbit monoclonal anti-CDK4                                          | Cell Signaling Technology (MA, USA)       | Cat# 2906P       |
| Rabbit monoclonal anti-CDK6                                          | Cell Signaling Technology (MA, USA)       | Cat# 3136P       |
| Rabbit monoclonal anti-cyclin D1                                     | Cell Signaling Technology (MA, USA)       | Cat# 2978S       |
| Rabbit monoclonal anti-STAT3                                         | Cell Signaling Technology (MA, USA)       | Cat# 4904S       |
| Mouse monoclonal anti-p-STAT3                                        | Cell Signaling Technology (MA, USA)       | Cat# 4113S       |
| Rabbit monoclonal anti-NF-κB p65                                     | Cell Signaling Technology (MA, USA)       | Cat# 8242S       |
| Rabbit monoclonal anti-p-NF-κB p65                                   | Cell Signaling Technology (MA, USA)       | Cat# 3033S       |
| Rabbit monoclonal anti-SphK1                                         | ProteinTech Group (Wuhan, China)          | Cat# 10670-1-AP  |
| Rabbit monoclonal anti-SphK2                                         | ProteinTech Group (Wuhan, China)          | Cat# 17096-1-AP  |
| Anti-rabbit IgG, HRP-linked antibody                                 | Cell Signaling Technology (MA, USA)       | Cat# 7074        |
| Anti-mouse IgG, HRP-linked antibody                                  | Cell Signaling Technology (MA, USA)       | Cat# 7076        |
| <b>Chemicals</b>                                                     |                                           |                  |
| ABC294640                                                            | Selleck Chemicals (MA, USA)               | Cat# 915385-81-8 |
| Crystal violet                                                       | Sigma-Aldrich (MO, USA)                   | Cat# 548-62-9    |
| Dimethyl sulfoxide (DMSO)                                            | Sigma-Aldrich (MO, USA)                   | Cat# 67-68-5     |
| Dulbecco's modified Eagle's medium (DMEM)                            | WISENT (Nanjing, China)                   | Cat# 319-005-CL  |
| Fetal bovine serum                                                   | WISENT (Nanjing, China)                   | Cat# 087-150     |
| Isoflurane                                                           | RWD Life Science (Shenzhen, China)        | Cat# 217170701   |
| Lipofectamine™ 2000                                                  | Life Technologies (CA, USA)               | Cat# 11668019    |
| NP-40 lysis buffer                                                   | Beyotime (Shanghai, China)                | Cat# P0013F      |
| OptiPro™ SFM                                                         | Life Technologies (CA, USA)               | Cat# 12309019    |
| Paraformaldehyde                                                     | Sigma-Aldrich (MO, USA)                   | Cat# p6148       |
| Penicillin and streptomycin                                          | WISENT (Nanjing, China)                   | Cat# 450-201-EI  |
| PMSF Protease Inhibitor                                              | Thermo Fisher Scientific (MA, USA)        | Cat# 36978       |
| Polyvinylidene difluoride (PVDF) membranes                           | Roche Applied Science (Mannheim, Germany) | Cat# 03010040001 |
| Primary Antibody Dilution Buffer                                     | Beyotime (Shanghai, China)                | Cat# P0023A      |
| Regorafenib                                                          | Selleck Chemicals (MA, USA)               | Cat# S1178       |
| Sodium dodecyl sulfate polyacrylamide gel electrophoresis (SDS-PAGE) | Beyotime (Shanghai, China)                | Cat# P0690       |
| Sphingosine-1-Phosphate (S1P)                                        | Cayman Chemical (MI, USA)                 | Cat# 62570       |
| High-Sig ECL Western Blotting Substrate                              | Biosharp (Beijing, China)                 | Cat# BL520A      |
| <b>Critical Assays</b>                                               |                                           |                  |
| Annexin V-FITC/PI double staining assay kit                          | Vazyme (Nanjing, China)                   | Cat# A211-02     |
| BCA protein assay Kit                                                | Beyotime (Shanghai, China)                | Cat# P0010       |
| Cell Counting Kit-8 assay kit                                        | Selleck Chemicals (MA, USA)               | Cat# B34304      |
| Cell cycle assay kit                                                 | MultiSciences (Hangzhou, China)           | Cat# 70-CCS012   |
| <b>Cell Lines</b>                                                    |                                           |                  |
| BEL-7402 human HCC cells                                             | Cell Bank of the Chinese Academy of       | TCHu10           |

|                            |                                                                                              |              |
|----------------------------|----------------------------------------------------------------------------------------------|--------------|
| HuH-7 human HCC cells      | Sciences (Shanghai, China)<br>Cell Bank of the Chinese Academy of Sciences (Shanghai, China) | TCHu182      |
| MHCC97H human HCC cells    | Professor Jia Fan from Zhongshan Hospital of Fudan University                                | N/A          |
| PLC/PRF/5 human HCC cells  | Cell Bank of the Chinese Academy of Sciences (Shanghai, China)                               | TCHu119      |
| SMMC-7721 human HCC cells  | Cell Bank of the Chinese Academy of Sciences (Shanghai, China)                               | TCHu52       |
| <b>Experimental Models</b> |                                                                                              |              |
| Mouse: BALB/c nu/nu        | Model Animal Research Center of Nanjing University (Nanjing, China)                          | N/A          |
| Commercial mice food       | Xietong Biological (Nanjing, China)                                                          | Cat# 1010010 |
